# Supplementary material for: MicroRNA-Regulated Ubiquitination and Lipid Metabolism Networks Are Associated With Chemotherapy Response in Ovarian Cancer
Source: Research Square preprint supplement (doi:10.21203/rs.3.rs-452935/v1), 2021-05-05
Supplement: Supplementary file 1 [file 68a5b8c28d76029cf722bc23.xlsx]

## Sheet: Sheet1
Table S9. Kaplan-Meier validation of differential mRNA expression analysis results in the AOCS cohort.
Gene ID	Array probe	log2 Fold Change	DEA p value	KM HR	KM p value	Replication
MIER1	1555105_a_at	-1.57016	0.0365468	0.52 (0.35, 0.77)	0.000861825	1
ANKRD46	236590_at	1.20323	0.0432667	0.56 (0.38, 0.83)	0.00345781	0
CCT2	201946_s_at	1.03608	0.00132842	0.58 (0.39, 0.85)	0.00491093	0
RPLP0	211972_x_at	1.14341	0.00211945	1.67 (1.13, 2.47)	0.0100138	1
RBM25	212033_at	0.536403	0.0438907	1.64 (1.11, 2.41)	0.0121448	1
KANSL1	225117_at	1.33615	0.00318361	1.63 (1.11, 2.4)	0.0126883	1
RPL13AP20	212790_x_at	0.673876	0.0326085	1.63 (1.1, 2.42)	0.0143386	1
NUMA1	200747_s_at	0.709422	0.0326085	1.6 (1.09, 2.36)	0.0164418	1
SUPT4H1	201484_at	-0.885532	0.00932493	0.64 (0.43, 0.94)	0.0223736	1
PRPH	213847_at	-1.33757	0.00467666	0.65 (0.44, 0.95)	0.0255754	1
ZNF205	206416_at	-0.997739	0.00332002	1.55 (1.04, 2.31)	0.0293617	0
OAZ1	215952_s_at	1.34071	0.00237977	0.65 (0.44, 0.96)	0.0299298	0
CXCR3	217119_s_at	-1.33464	0.0192076	1.54 (1.03, 2.31)	0.0347237	0
PARP9	223220_s_at	0.843777	0.0142185	0.66 (0.44, 0.97)	0.0348596	0
C19ORF33	223631_s_at	0.794699	0.0365468	1.5 (1.02, 2.21)	0.0389017	1
RPL21	200012_x_at	1.03454	0.039954	1.46 (0.99, 2.16)	0.0543981	0
ADTRP	229070_at	-0.984464	0.028398	1.46 (0.99, 2.15)	0.0555488	0
RNASET2	240720_at	0.578811	0.0293563	1.46 (0.99, 2.17)	0.0570225	0
SMAD4	202527_s_at	-0.896589	0.0493558	0.69 (0.46, 1.02)	0.0586292	0
SETD4	219482_at	-1.62511	0.000862355	0.69 (0.47, 1.02)	0.0595441	0
FTH1	200748_s_at	-0.816988	0.0258481	0.7 (0.47, 1.03)	0.0654958	0
ZNF266	214686_at	1.62617	7.15153e-07	1.43 (0.97, 2.11)	0.0658918	0
DGCR2	214198_s_at	-0.680377	0.0187661	1.43 (0.97, 2.1)	0.0683095	0
PLK1	202240_at	0.841813	0.016435	0.71 (0.48, 1.05)	0.0837093	0
IGHV3-30	215949_x_at	-1.97396	0.00578151	0.71 (0.49, 1.05)	0.086096	0
COL4A4	214602_at	-0.938084	0.00851517	0.72 (0.49, 1.06)	0.0931063	0
KRT14	209351_at	-1.55175	0.00516536	1.38 (0.94, 2.03)	0.101077	0
TRHDE	219937_at	1.7799	0.0241599	1.38 (0.94, 2.02)	0.103047	0
P2RX1	210401_at	-1.03675	0.0189911	0.73 (0.5, 1.07)	0.105965	0
KCNJ10	206692_at	-0.983783	0.0171939	0.73 (0.5, 1.07)	0.107612	0
CLU	222043_at	-1.63726	0.00259301	1.37 (0.93, 2.01)	0.109028	0
TPM1	1558532_at	1.02302	0.000224875	1.36 (0.93, 2)	0.111389	0
TPM1	1558532_at	1.25459	0.00284496	1.36 (0.93, 2)	0.111389	0
CAMTA1	227328_at	0.916009	0.0138674	0.73 (0.5, 1.08)	0.114298	0
NME1-NME2	201268_at	1.30071	0.0234941	0.74 (0.51, 1.09)	0.131884	0
IGLV1-47	234764_x_at	-2.53757	5.28892e-05	0.74 (0.5, 1.1)	0.134435	0
FOXF1	205935_at	0.893265	0.00363811	1.34 (0.91, 1.98)	0.140988	0
EIF5A	213753_x_at	1.35691	0.0405145	0.75 (0.51, 1.1)	0.142362	0
UBR4	231889_at	0.553421	0.0096902	1.33 (0.9, 1.97)	0.146657	0
IRF4	216986_s_at	-1.75138	2.88348e-05	0.75 (0.51, 1.11)	0.151069	0
BFSP1	206746_at	-0.794249	0.0340295	1.33 (0.9, 1.95)	0.153556	0
PTGS1	215813_s_at	0.682095	0.025984	0.76 (0.52, 1.11)	0.154889	0
PVT1	222087_at	0.689041	0.0444905	0.76 (0.51, 1.12)	0.158699	0
CCNY	224652_at	-1.30426	0.000275861	1.32 (0.89, 1.96)	0.160339	0
NDRG4	209159_s_at	-1.18992	0.00134589	1.31 (0.89, 1.93)	0.163609	0
IGHV3-7	217281_x_at	-2.04593	0.00579398	0.77 (0.52, 1.13)	0.178526	0
KLK11	205470_s_at	1.62875	0.00379605	1.3 (0.88, 1.93)	0.189713	0
POU2AF1	205267_at	-1.32618	0.00113627	1.29 (0.88, 1.89)	0.197325	0
IGHM	212827_at	-2.48935	8.68359e-07	1.28 (0.87, 1.88)	0.210522	0
HMCN2	241650_x_at	1.41296	0.0207581	1.28 (0.87, 1.89)	0.214201	0
HMCN2	241650_x_at	1.44695	0.0251546	1.28 (0.87, 1.89)	0.214201	0
MTHFD1	202309_at	1.90172	2.81929e-05	0.79 (0.53, 1.16)	0.224127	0
IGHV1-69	240915_at	-2.4585	0.00103533	1.27 (0.86, 1.86)	0.229064	0
CDHR3	235650_at	1.59999	0.00404076	1.26 (0.86, 1.86)	0.234679	0
MLST8	220587_s_at	1.11162	0.00707354	1.27 (0.86, 1.87)	0.236094	0
EIF3E	235429_at	0.926145	0.00959559	0.8 (0.54, 1.17)	0.249229	0
REEP6	226597_at	0.999857	0.00659033	1.25 (0.85, 1.84)	0.250615	0
NVL	207877_s_at	1.14546	0.0357267	1.25 (0.85, 1.84)	0.253498	0
RPS20	1560021_at	1.09975	0.00100405	1.25 (0.85, 1.84)	0.253941	0
SLC3A2	200924_s_at	1.21956	0.00570406	0.8 (0.54, 1.18)	0.254809	0
GABBR2	209991_x_at	-1.43565	0.0326085	1.25 (0.85, 1.84)	0.256829	0
NR5A2	208343_s_at	-1.05876	0.00831317	1.25 (0.85, 1.83)	0.261613	0
ERBB2	234354_x_at	-1.02735	0.0340295	1.25 (0.84, 1.85)	0.265733	0
BMP6	206176_at	-0.996575	0.00777402	0.8 (0.55, 1.18)	0.268742	0
CCNH	204093_at	0.60851	0.00334087	1.25 (0.84, 1.84)	0.270084	0
MUC12	231814_at	1.78206	0.000432324	1.23 (0.84, 1.81)	0.290538	0
RPL7A	217740_x_at	2.39224	1.97657e-09	0.81 (0.55, 1.2)	0.297371	0
RPL7A	217740_x_at	1.14423	0.00132842	0.81 (0.55, 1.2)	0.297371	0
RPL7A	217740_x_at	0.971054	0.00309698	0.81 (0.55, 1.2)	0.297371	0
KCNIP4	236783_at	1.13487	0.0241599	1.23 (0.83, 1.8)	0.297796	0
IGHG3	228518_at	-1.9499	0.000355691	1.23 (0.83, 1.81)	0.29838	0
TMEM9B	222507_s_at	0.700685	0.0363772	0.82 (0.56, 1.2)	0.303355	0
ZCCHC12	228715_at	1.80043	0.000212762	1.22 (0.83, 1.8)	0.305212	0
PTPRN	204945_at	1.04567	0.0405145	1.23 (0.83, 1.82)	0.31056	0
HOXD10	207373_at	1.05672	0.00711562	1.22 (0.83, 1.8)	0.317699	0
TBCB	216194_s_at	0.969564	0.0028925	1.22 (0.83, 1.79)	0.320001	0
THY1	208850_s_at	1.0775	0.0340295	0.82 (0.56, 1.21)	0.320764	0
GALNT15	239461_at	0.957062	0.0341839	0.83 (0.56, 1.21)	0.326639	0
RPS2P46	217466_x_at	0.565823	0.0288334	1.21 (0.82, 1.79)	0.344397	0
GRAMD1C	219313_at	0.778806	0.0187661	1.2 (0.82, 1.77)	0.345059	0
LCN2	212531_at	1.12907	0.0212573	1.21 (0.82, 1.78)	0.345261	0
CD38	205692_s_at	-0.954326	0.0138674	0.83 (0.57, 1.23)	0.355835	0
GAS5	224741_x_at	1.12914	0.0228408	1.19 (0.81, 1.75)	0.381663	0
HNRNPF	201376_s_at	1.62302	8.68359e-07	0.85 (0.57, 1.24)	0.393538	0
R3HCC1	212866_at	-0.65156	0.0434043	1.18 (0.8, 1.73)	0.397922	0
IFI27	202411_at	1.19267	0.0316206	0.85 (0.58, 1.25)	0.398435	0
KDM3A	242758_x_at	1.06564	0.031928	0.85 (0.58, 1.25)	0.40485	0
IGHG2	211430_s_at	-1.60017	0.00663677	0.85 (0.58, 1.25)	0.405269	0
PON1	206345_s_at	-1.52031	0.0171939	1.18 (0.8, 1.73)	0.410104	0
PCDHB7	231738_at	-1.00307	0.0215777	0.85 (0.58, 1.25)	0.413871	0
CSF3R	1553297_a_at	-1.11196	0.029838	1.17 (0.79, 1.72)	0.429212	0
IGHV4-34	211639_x_at	-2.21342	0.00311408	0.86 (0.59, 1.26)	0.439826	0
SUMF2	225002_s_at	1.03924	0.0300255	1.16 (0.79, 1.7)	0.452898	0
PDCD2	228420_at	0.378719	0.0326085	0.86 (0.58, 1.27)	0.452965	0
AIF1L	223074_s_at	1.3	0.0124062	0.86 (0.59, 1.27)	0.453039	0
NXN	219489_s_at	1.60311	0.00113627	0.87 (0.59, 1.27)	0.458315	0
YY1AP1	217836_s_at	-0.762269	0.0341839	0.87 (0.59, 1.27)	0.470024	0
IGHV3-23	211650_x_at	-1.75514	0.0192737	0.87 (0.59, 1.28)	0.473341	0
CA11	209726_at	0.713809	0.0241599	0.87 (0.59, 1.28)	0.473573	0
CCIN	210642_at	-0.899167	0.0192076	1.15 (0.78, 1.7)	0.479887	0
WDR45	209216_at	0.663952	0.0241599	0.87 (0.59, 1.28)	0.482176	0
IGKC	221671_x_at	-2.15937	0.000147377	0.87 (0.59, 1.29)	0.493591	0
RPL7L1	224738_x_at	-0.895233	0.0039416	0.88 (0.6, 1.29)	0.498845	0
IGKV1-17	211645_x_at	-2.36422	0.000691751	0.88 (0.6, 1.29)	0.50658	0
CD59	200984_s_at	-1.0941	0.0016286	0.88 (0.6, 1.29)	0.510445	0
TFPI2	209278_s_at	0.963592	0.019477	1.13 (0.77, 1.67)	0.519617	0
SLC25A38	217961_at	0.436437	0.0251201	0.89 (0.6, 1.3)	0.542112	0
LRIG1	211596_s_at	-1.51064	0.0138674	1.13 (0.77, 1.65)	0.546002	0
PLA2G2D	220423_at	-1.78364	0.000494382	0.89 (0.61, 1.31)	0.551343	0
NBR1	1568856_at	0.907211	0.0497024	1.12 (0.76, 1.65)	0.555034	0
ZYX	200808_s_at	1.29914	0.00284496	1.12 (0.76, 1.65)	0.557686	0
TRIM9	209859_at	1.41253	0.00146537	1.12 (0.76, 1.65)	0.566828	0
ITM2A	202747_s_at	-0.831601	0.0222255	0.89 (0.61, 1.32)	0.570483	0
ABCC9	1557374_at	-0.927446	0.0280967	1.12 (0.76, 1.64)	0.572128	0
TCF15	207306_at	0.828566	0.0340295	1.12 (0.76, 1.66)	0.57588	0
TSPAN1	209114_at	1.75505	1.17176e-05	0.9 (0.61, 1.32)	0.58518	0
IGKV2-28	214768_x_at	-3.11468	8.68359e-07	0.9 (0.61, 1.33)	0.60215	0
IGLV3-19	216853_x_at	-2.19145	0.00175852	0.9 (0.62, 1.33)	0.609495	0
IGHV5-51	215721_at	-3.03675	8.68359e-07	1.1 (0.75, 1.63)	0.624073	0
RELN	205923_at	-2.52743	1.70266e-05	0.91 (0.62, 1.34)	0.636635	0
TTYH1	219415_at	-1.7256	0.00620164	1.1 (0.75, 1.61)	0.640724	0
TTYH1	219415_at	-1.55629	0.00851517	1.1 (0.75, 1.61)	0.640724	0
C16ORF54	1559584_a_at	-0.760009	0.0497024	1.09 (0.74, 1.61)	0.648324	0
NLGN1	231361_at	-1.30954	0.0111032	1.09 (0.74, 1.59)	0.671745	0
CD79A	205049_s_at	-2.02558	8.68359e-07	0.92 (0.63, 1.35)	0.674975	0
IGKV4-1	214777_at	-2.38595	7.09858e-05	1.08 (0.74, 1.59)	0.682919	0
IGLV3-25	215214_at	-1.9025	0.0340295	1.08 (0.73, 1.59)	0.694772	0
MZB1	223565_at	-1.4365	0.00183191	1.08 (0.74, 1.58)	0.698706	0
MZB1	223565_at	-1.8612	0.0237209	1.08 (0.74, 1.58)	0.698706	0
CD27	206150_at	-1.05682	0.000880046	1.07 (0.73, 1.58)	0.715477	0
IGHV4-61	211637_x_at	-2.49687	4.55905e-05	0.94 (0.64, 1.38)	0.752242	0
IGKV1-39	215176_x_at	-2.43562	0.000244169	0.94 (0.64, 1.38)	0.753546	0
KCNA3	207237_at	-0.995714	0.011456	0.94 (0.64, 1.38)	0.756704	0
RPL12	200809_x_at	0.664794	0.00404076	0.94 (0.63, 1.39)	0.76023	0
IGLC2	214677_x_at	-1.91573	0.000500595	0.96 (0.65, 1.4)	0.817804	0
AREG	205239_at	1.36399	0.0100975	0.96 (0.65, 1.41)	0.831262	0
PODXL	201578_at	-0.884706	0.00311408	1.04 (0.71, 1.53)	0.837588	0
DNM2	202253_s_at	-1.05482	0.00126225	0.96 (0.66, 1.42)	0.852422	0
SNRPB	213175_s_at	-0.895588	0.0340295	0.96 (0.66, 1.42)	0.853974	0
RPL19	200029_at	1.21228	0.000165844	0.98 (0.66, 1.44)	0.912225	0
IGKV3-20	211644_x_at	-1.84642	0.0133467	1.02 (0.69, 1.5)	0.913362	0
PLK2	201939_at	1.11411	0.000484145	1.02 (0.69, 1.5)	0.915729	0
PRSS1	205869_at	-2.09896	0.00132842	0.99 (0.67, 1.45)	0.942959	0
SHMT1	209980_s_at	-0.953346	0.0405145	1.01 (0.69, 1.49)	0.944339	0
IGKV1-12	-	-3.1026	5.35972e-07			-
IGHGP	-	-2.6347	5.35972e-07			-
IGHV4-4	-	-3.09723	4.7752e-06			-
IGKV1-33	-	-2.82421	8.21488e-06			-
IGKV1-5	-	-2.44578	2.81929e-05			-
ACPP	-	-2.06755	3.47881e-05			-
IGHV3-33	-	-2.47445	3.91769e-05			-
SNORD17	-	1.67615	4.55905e-05			-
IGHV1-18	-	-2.52158	0.000224875			-
PPP2R4	-	1.44696	0.000265275			-
RPL26	-	1.35982	0.000346596			-
IGHG4	-	-1.97324	0.000385771			-
IGKV1D-12	-	-2.61311	0.000385771			-
LINC00969	-	-1.22414	0.000419118			-
IGKV3D-11	-	-2.24055	0.000726186			-
TMEM215	-	1.89159	0.000862355			-
IGKV1D-33	-	-2.74596	0.000880046			-
IGHV2-5	-	-2.40602	0.00104015			-
IGLV3-1	-	-2.29556	0.00113627			-
TMEM110-MUSTN1	-	-1.23409	0.00113627			-
IGKV1D-39	-	-2.26656	0.00119644			-
IGLV1-44	-	-2.01764	0.0016286			-
IGLC6	-	-1.79177	0.0021942			-
PCNXL4	-	1.5005	0.00284496			-
IGLC3	-	-1.69878	0.00314651			-
IGHV4-39	-	-2.10315	0.00343608			-
RP11-436H11.1	-	0.708749	0.00474875			-
IGLV6-57	-	-1.83898	0.00606897			-
AC018738.2	-	0.691761	0.0061389			-
IGKV3D-20	-	-1.97162	0.00689753			-
AC096579.7	-	-1.63253	0.00974204			-
RP11-284N8.3	-	-0.874283	0.0122638			-
RP11-361F15.2	-	0.560281	0.0128518			-
IGKV1-6	-	-1.95217	0.0146769			-
RPS11P5	-	0.593648	0.0163221			-
C16ORF62	-	-1.29625	0.0168722			-
NUGGC	-	-0.932889	0.0222354			-
IGJ	-	-1.3618	0.0241599			-
RP11-364L4.1	-	0.565694	0.0251201			-
IGKV3-15	-	-1.64446	0.0258481			-
RP11-127B20.2	-	0.748341	0.0302553			-
IGHV1-46	-	-1.67616	0.0316206			-
RP11-106M3.1	-	0.4699	0.0316206			-
KIAA1161	-	-0.538664	0.0340295			-
AC026806.2	-	0.675658	0.0341839			-
AC000068.5	-	-0.513396	0.0353546			-
RPS4XP6	-	0.496723	0.0365468			-
SPG20	-	-1.17432	0.0367364			-
SNORA73B	-	1.16962	0.0373779			-
FAM46C	-	-0.760873	0.0379649			-
KIAA0368	-	0.733024	0.0405145			-
IGKV3D-15	-	-1.63278	0.0466211			-
AOCS, Australian Ovarian Cancer Study; DEA, Differential Expression Analysis; KM, Kaplan-Meier; HR, Hazard Ratio
