# Supplementary material for: MicroRNA-Regulated Ubiquitination and Lipid Metabolism Networks Are Associated With Chemotherapy Response in Ovarian Cancer
Source: Research Square preprint supplement (doi:10.21203/rs.3.rs-452935/v1), 2021-05-05
Supplement: Supplementary file 2 [file d6658e2f249f0f91d67d968c.xlsx]

## Sheet: Sheet1
Table S4. Predictor coefficients and p-values for the generalized linear models for each module. The models included module eigengene expression and patient age to predict chemoresistance.
Module color	Intercept estimate	Intercept p	Module eigenvector estimate	Module eigenvector p	Age estimate	Age p
lavenderblush3	-2.3356	0.00725001	-5.39932	0.0160102	0.032528	0.0229731
darkolivegreen	-2.78045	0.00113601	13.6334	0.0321495	0.0389647	0.00531985
lightyellow	-2.67597	0.00178375	-4.12391	0.0518256	0.0383664	0.00629033
plum1	-2.81124	0.000984218	3.94412	0.0648804	0.040666	0.00365438
skyblue1	-2.77327	0.00113219	-3.64775	0.0862803	0.0400567	0.00414626
coral1	-2.80964	0.00100714	-3.5841	0.0926964	0.0406563	0.00370731
salmon	-2.81299	0.000977101	3.50669	0.0960053	0.0407464	0.00359696
darkorange	-2.48894	0.00407203	-3.47127	0.115457	0.0352015	0.0133844
turquoise	-2.74836	0.00120426	-3.13264	0.136091	0.0396827	0.00438214
orange	-2.75239	0.00119402	3.10074	0.149483	0.0397141	0.00436296
thistle3	-2.86087	0.000809481	2.88806	0.16865	0.0415702	0.00300419
mediumpurple2	-2.73349	0.00128402	-2.82793	0.187282	0.0394024	0.0046607
thistle2	-2.80217	0.00100869	2.64993	0.213274	0.0405979	0.00368863
lightsteelblue1	-2.89972	0.000707607	-2.62602	0.213419	0.0422584	0.00264675
sienna3	-2.90954	0.00070256	-2.53378	0.237809	0.0424044	0.00260639
saddlebrown	-2.75951	0.00111902	2.41239	0.245971	0.0398706	0.00407707
darkgreen	-2.69871	0.0015384	-2.37209	0.253027	0.0388332	0.00542976
darkviolet	-2.88713	0.000747882	-2.29711	0.277373	0.0420222	0.00275953
honeydew1	-2.90618	0.000700804	5.84276	0.311415	0.042057	0.00275669
red	-2.78746	0.00103332	-2.09754	0.312303	0.0403511	0.00376643
skyblue	-3.16812	0.000799786	-2.30346	0.323873	0.0467735	0.0026292
skyblue3	-2.64928	0.00181356	-4.5753	0.33628	0.0382985	0.00604277
maroon	-2.74258	0.00119781	-1.94301	0.355052	0.0396042	0.00435279
tan	-2.77563	0.00105523	-1.82453	0.384965	0.0401445	0.00384266
yellow4	-2.79387	0.000988466	-1.8243	0.385928	0.0404695	0.00362101
skyblue2	-2.68888	0.00157907	-1.825	0.38768	0.0387118	0.00559512
mediumpurple3	-2.84765	0.000842091	-1.75511	0.40552	0.0413741	0.00308841
darkolivegreen4	-2.7135	0.00139267	-1.76369	0.487362	0.0391559	0.00491516
yellowgreen	-2.82537	0.000925551	1.39088	0.506814	0.0410026	0.00336614
blue	-2.81593	0.000917928	1.36873	0.514305	0.0408487	0.00336097
firebrick4	-2.81516	0.000936508	1.3639	0.517658	0.0408345	0.00341652
lightsteelblue	-2.81043	0.000920717	-1.33603	0.521601	0.0407615	0.00337898
orangered3	-2.69117	0.00160665	-1.87187	0.535037	0.0388148	0.00554726
darkred	-2.69217	0.00170369	1.28837	0.544385	0.0387559	0.00592907
brown4	-2.79385	0.000976046	-1.26005	0.545339	0.0404778	0.00356744
darkgrey	-2.72065	0.00139998	-1.14018	0.58968	0.039239	0.00497348
indianred4	-2.77934	0.00104443	1.06553	0.610035	0.040231	0.00379224
purple	-2.82504	0.000955986	-0.845086	0.688796	0.0410196	0.00346806
darkorange2	-2.82779	0.000973418	0.833845	0.694404	0.0410597	0.00350679
coral2	-2.781	0.00101408	-0.730666	0.727336	0.0402675	0.0036963
pink	-2.75799	0.00113592	0.686944	0.741647	0.0398845	0.0041065
plum3	-2.78135	0.00101907	0.684467	0.742964	0.0402776	0.00371395
palevioletred3	-2.75932	0.00113248	-0.630546	0.764141	0.0399103	0.00409549
greenyellow	-2.79458	0.00100026	0.572036	0.783953	0.0405015	0.00363441
blue2	-2.79059	0.00101147	0.566333	0.787258	0.0404283	0.00366663
mediumorchid	-2.78643	0.00100855	0.54543	0.793037	0.0403616	0.00366836
thistle1	-2.76266	0.00112066	-0.5332	0.797854	0.0399623	0.00405154
plum	-2.73483	0.00150002	-0.542687	0.798666	0.039489	0.00523833
thistle	-2.76357	0.00110617	-0.489308	0.815338	0.0399824	0.00400695
green	-2.77331	0.00104858	0.450068	0.830003	0.0401438	0.00381459
bisque4	-2.79798	0.00102638	0.444974	0.831117	0.0405621	0.00371255
lightcyan1	-2.76513	0.00112378	0.361256	0.862877	0.0400047	0.00405681
white	-2.76742	0.00109258	-0.343875	0.869258	0.0400475	0.00395667
navajowhite2	-2.77586	0.00103479	-0.338138	0.872515	0.0401856	0.00376644
darkslateblue	-2.77633	0.00103237	0.323184	0.881777	0.0401958	0.00376006
floralwhite	-2.78048	0.00102607	-0.207219	0.920958	0.0402679	0.00373676
brown2	-2.7767	0.00103135	-0.0522526	0.980126	0.0402025	0.00375499
darkseagreen4	-2.77739	0.00105364	0.0292668	0.988865	0.0402146	0.00382405
